# Supplementary material for: Routine mapping of Fusarium wilt resistance in BC1 populations of Arabidopsis thaliana
Source: PubMed Central journal article supplement (PMC3819736; doi:10.1186/1471-2229-13-171), 2013-10-30
Supplement: 1471-2229-13-171-S1.pdf [file 1471-2229-13-171-S1.pdf]

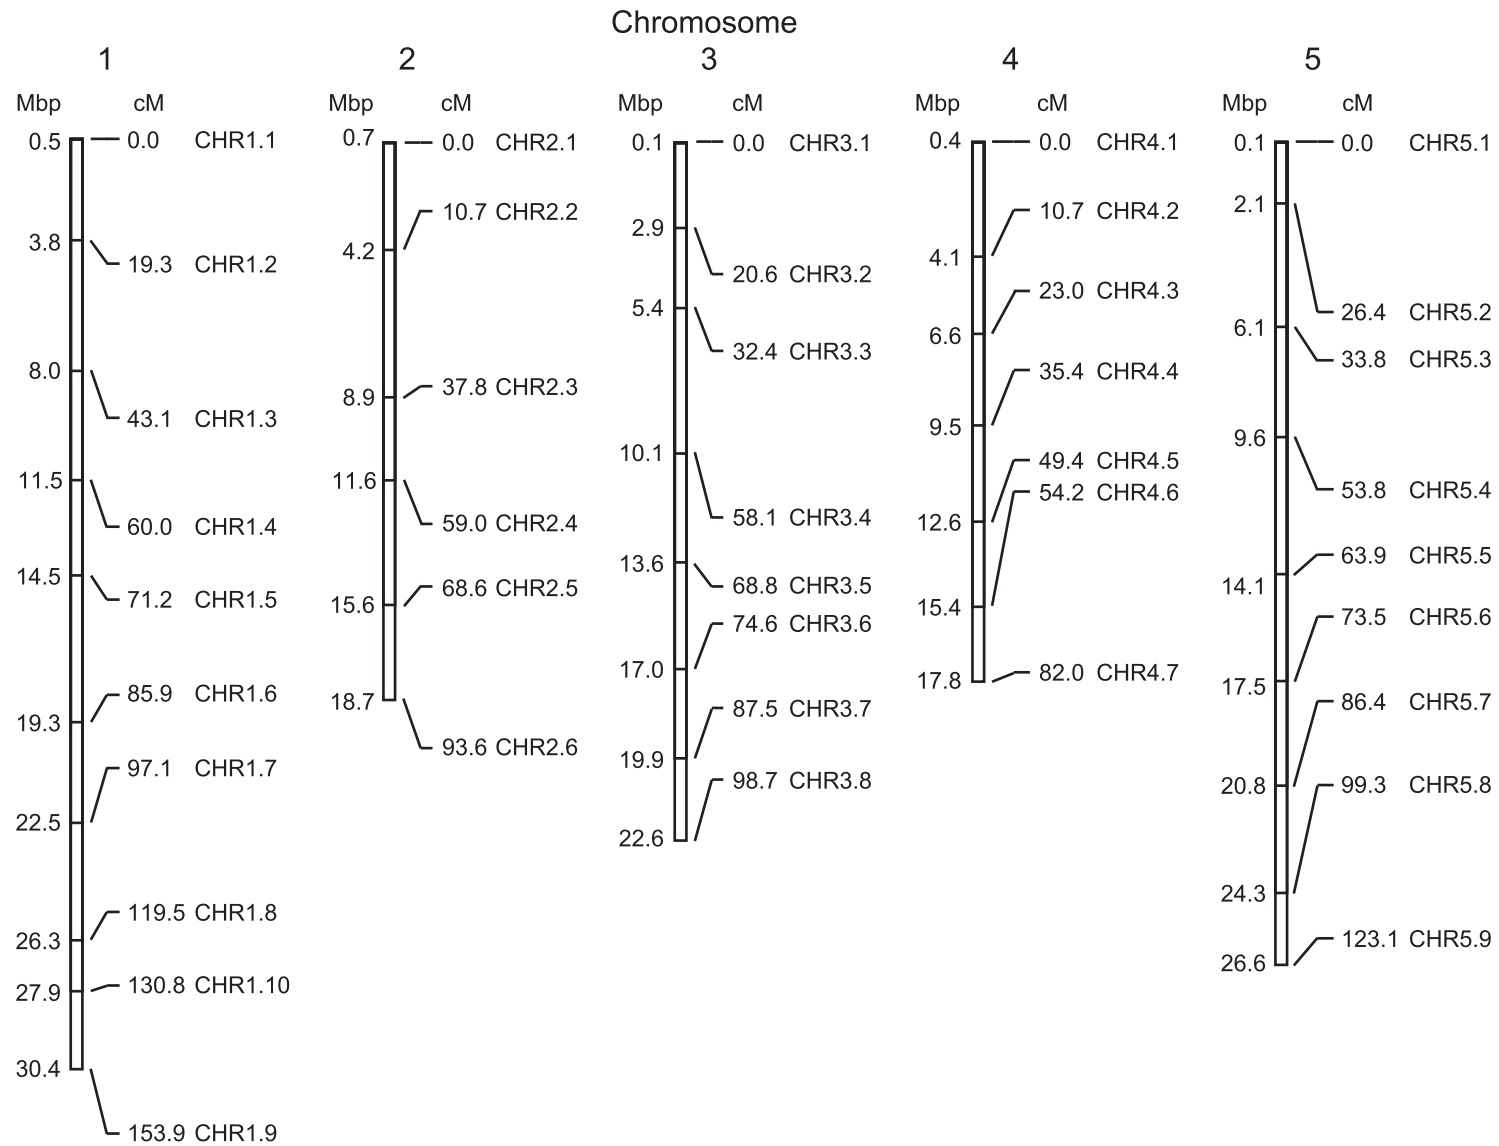

Figure S1. Genetic map of CHR markers in FOM-infected r-T population  
 Corresponding nucleotide positions in megabasepairs (Mbp, to the left) and genetic positions in centiMorgans (cM, to the right) of 40 CHR markers on the five *Arabidopsis* chromosomes (vertical bars) are shown. Nucleotide positions are from the TAIR10 reference sequence. Genetic distances between markers were calculated using the Kosambi mapping function and recombination frequencies in the r-T BC<sub>1</sub> population.
