# Supplementary material for: Routine mapping of Fusarium wilt resistance in BC1 populations of Arabidopsis thaliana
Source: PubMed Central journal article supplement (PMC3819736; doi:10.1186/1471-2229-13-171), 2013-10-30
Supplement: 1471-2229-13-171-S3.pdf [file 1471-2229-13-171-S3.pdf]

**Table S1. Linkage of CHR markers in the FOM-infected *r*-T BC<sub>1</sub> population**

| Chromosome 1        |                 |                 | Chromosome 2 |       |      | Chromosome 3        |       |      | Chromosome 4 |       |      | Chromosome 5 |       |       |
|---------------------|-----------------|-----------------|--------------|-------|------|---------------------|-------|------|--------------|-------|------|--------------|-------|-------|
| Marker <sup>a</sup> | Rf <sup>b</sup> | cM <sup>c</sup> | Marker       | Rf    | cM   | Marker <sup>c</sup> | Rf    | cM   | Marker       | Rf    | cM   | Marker       | Rf    | cM    |
| CHR1.1              | —               | 0.0             | CHR2.1       | —     | 0.0  | CHR3.1              | —     | 0.0  | CHR4.1       | —     | 0.0  | CHR5.1       | —     | 0.0   |
| CHR1.2              | 0.193           | 19.3            | CHR2.2r      | 0.107 | 10.7 | CHR3.2              | 0.206 | 20.6 | CHR4.2       | 0.107 | 10.7 | CHR5.2m      | 0.264 | 26.4  |
| CHR1.3              | 0.237           | 43.1            | CHR2.3o      | 0.271 | 37.8 | CHR3.3              | 0.118 | 32.4 | CHR4.3       | 0.124 | 23.0 | CHR5.3       | 0.074 | 33.8  |
| CHR1.4              | 0.169           | 60.0            | CHR2.4s      | 0.212 | 59.0 | CHR3.4              | 0.257 | 58.1 | CHR4.4       | 0.124 | 35.4 | CHR5.4       | 0.199 | 53.8  |
| CHR1.5              | 0.112           | 71.2            | CHR2.5       | 0.096 | 68.6 | CHR3.5              | 0.107 | 68.8 | CHR4.5       | 0.140 | 49.4 | CHR5.5       | 0.101 | 63.9  |
| CHR1.6              | 0.146           | 85.9            | CHR2.6       | 0.251 | 93.6 | CHR3.6              | 0.058 | 74.6 | CHR4.6       | 0.048 | 54.2 | CHR5.6       | 0.096 | 73.5  |
| CHR1.7n             | 0.112           | 97.1            |              |       |      | CHR3.7              | 0.129 | 87.5 | CHR4.7       | 0.278 | 82.0 | CHR5.7       | 0.129 | 86.4  |
| CHR1.8              | 0.224           | 119.5           |              |       |      | CHR3.8              | 0.112 | 98.7 |              |       |      | CHR5.8       | 0.129 | 99.3  |
| CHR1.10             | 0.112           | 130.8           |              |       |      |                     |       |      |              |       |      | CHR5.9m      | 0.237 | 123.1 |
| CHR1.9              | 0.231           | 153.9           |              |       |      |                     |       |      |              |       |      |              |       |       |

<sup>a</sup> DNA markers are described in Methods.

<sup>b</sup> Recombination frequency is between marker and above marker.

<sup>c</sup> Map position is in centiMorgans.
