# Supplementary material for: Routine mapping of Fusarium wilt resistance in BC1 populations of Arabidopsis thaliana
Source: PubMed Central journal article supplement (PMC3819736; doi:10.1186/1471-2229-13-171), 2013-10-30
Supplement: 1471-2229-13-171-S4.pdf [file 1471-2229-13-171-S4.pdf]

**Table S2. Linkage of SSLP and CHR markers in FOM-infected C-T BC<sub>1</sub> population**

| Chromosome 1        |                 |                 | Chromosome 2 |       |      | Chromosome 3 |       |       | Chromosome 4 |       |      | Chromosome 5 |       |       |
|---------------------|-----------------|-----------------|--------------|-------|------|--------------|-------|-------|--------------|-------|------|--------------|-------|-------|
| Marker <sup>a</sup> | Rf <sup>b</sup> | cM <sup>c</sup> | Marker       | Rf    | cM   | Marker       | Rf    | cM    | Marker       | Rf    | cM   | Marker       | Rf    | cM    |
| CHR1.1              | —               | 0.0             | CHR2.1       | —     | 0.0  | CHR3.1       | —     | 0.0   | CHR4.1       | —     | 0.0  | CHR5.1       | —     | 0.0   |
| F21M12              | 0.150           | 15.0            | CIW2         | 0.034 | 3.4  | NGA172       | 0.039 | 3.9   | CIW5         | 0.030 | 3.0  | CTR1         | 0.140 | 14.0  |
| CHR1.2              | 0.017           | 16.7            | CHR2.2       | 0.047 | 8.1  | CHR3.2       | 0.095 | 13.4  | CHR4.2       | 0.051 | 8.1  | CHR5.2       | 0.064 | 20.5  |
| CHR1.3              | 0.154           | 32.1            | CHR2.3       | 0.218 | 29.9 | NGA162       | 0.043 | 17.7  | CHR4.3       | 0.109 | 19.0 | CHR5.3       | 0.145 | 35.0  |
| CIW12               | 0.095           | 41.6            | PLS7         | 0.047 | 34.6 | CHR3.3       | 0.047 | 22.4  | CIW6         | 0.140 | 33.0 | CIW8         | 0.047 | 39.7  |
| CHR1.4              | 0.086           | 50.2            | C4H          | 0.131 | 47.8 | CIW11        | 0.289 | 51.3  | CHR4.4       | 0.073 | 40.3 | CHR5.4       | 0.109 | 50.5  |
| F15O4               | 0.073           | 57.6            | CHR2.5       | 0.064 | 54.2 | CHR3.4       | 0.017 | 53.0  | CIW7         | 0.104 | 50.7 | PHYC         | 0.131 | 63.7  |
| CHR1.5              | 0.034           | 61.0            | BIO2         | 0.104 | 64.6 | CHR3.5       | 0.091 | 62.1  | CHR4.5       | 0.064 | 57.2 | CHR5.5       | 0.000 | 63.7  |
| CHR1.6              | 0.159           | 76.9            | CHR2.6       | 0.043 | 68.9 | CHR3.6       | 0.086 | 70.7  | CHR4.6       | 0.047 | 61.9 | CIW9         | 0.150 | 78.6  |
| NGA280              | 0.047           | 81.6            |              |       |      | CIW4         | 0.082 | 78.9  | CHR4.7       | 0.188 | 80.7 | CHR5.6       | 0.021 | 80.8  |
| CHR1.7              | 0.030           | 84.6            |              |       |      | CHR3.7       | 0.043 | 83.2  | NGA1107      | 0.051 | 85.8 | CHR5.7       | 0.140 | 94.8  |
| CHR1.8              | 0.183           | 102.9           |              |       |      | CHR3.8       | 0.173 | 100.5 |              |       |      | CHR5.8       | 0.145 | 109.3 |
| NGA111              | 0.069           | 109.8           |              |       |      | NGA6         | 0.056 | 106.1 |              |       |      | MBK5         | 0.086 | 117.9 |
| CHR1.10             | 0.009           | 110.6           |              |       |      |              |       |       |              |       |      | CHR5.9       | 0.078 | 125.7 |
| F3F9.2              | 0.173           | 128.0           |              |       |      |              |       |       |              |       |      |              |       |       |
| CHR1.9              | 0.013           | 129.2           |              |       |      |              |       |       |              |       |      |              |       |       |

<sup>a</sup> DNA markers are described in Methods.

<sup>b</sup> Recombination frequency is between marker and above marker.

<sup>c</sup> Map position is in centiMorgans.
