# Supplementary material for: Routine mapping of Fusarium wilt resistance in BC1 populations of Arabidopsis thaliana
Source: PubMed Central journal article supplement (PMC3819736; doi:10.1186/1471-2229-13-171), 2013-10-30
Supplement: 1471-2229-13-171-S7.pdf [file 1471-2229-13-171-S7.pdf]

**Table S4. Linkage of CHR markers in FOC-infected C-T BC<sub>1</sub> population**

| Chromosome 1        |                 |                 | Chromosome 2 |       |      | Chromosome 3 |       |      | Chromosome 4 |       |      | Chromosome 5 |       |       |
|---------------------|-----------------|-----------------|--------------|-------|------|--------------|-------|------|--------------|-------|------|--------------|-------|-------|
| Marker <sup>a</sup> | Rf <sup>b</sup> | cM <sup>c</sup> | Marker       | Rf    | cM   | Marker       | Rf    | cM   | Marker       | Rf    | cM   | Marker       | Rf    | cM    |
| CHR1.1              | —               | 0.0             | CHR2.1       | —     | 0.0  | CHR3.1       | —     | 0.0  | CHR4.1       | —     | 0.0  | CHR5.1       | —     | 0.0   |
| CHR1.2              | 0.183           | 18.3            | CHR2.2r      | 0.065 | 6.5  | CHR3.2       | 0.183 | 18.3 | CHR4.2       | 0.040 | 4.0  | CHR5.2m      | 0.218 | 21.8  |
| CHR1.3              | 0.112           | 29.5            | CHR2.3o      | 0.194 | 26.0 | CHR3.3       | 0.065 | 24.8 | CHR4.3       | 0.155 | 19.5 | CHR5.3       | 0.101 | 31.9  |
| CHR1.4              | 0.149           | 44.4            | CHR2.4s      | 0.160 | 42.0 | CHR3.4       | 0.249 | 49.7 | CHR4.4       | 0.155 | 35.0 | CHR5.4       | 0.200 | 51.9  |
| CHR1.5              | 0.128           | 57.2            | CHR2.5       | 0.081 | 50.1 | CHR3.5       | 0.128 | 62.4 | CHR4.5       | 0.128 | 47.7 | CHR5.5       | 0.101 | 62.1  |
| CHR1.6              | 0.138           | 71.0            | CHR2.6       | 0.166 | 66.6 | CHR3.6       | 0.076 | 70.0 | CHR4.6       | 0.086 | 56.3 | CHR5.6       | 0.128 | 74.8  |
| CHR1.7n             | 0.081           | 79.1            |              |       |      | CHR3.7       | 0.112 | 81.2 | CHR4.7       | 0.160 | 72.3 | CHR5.7       | 0.155 | 90.3  |
| CHR1.8              | 0.166           | 95.6            |              |       |      | CHR3.8       | 0.166 | 97.8 |              |       |      | CHR5.8       | 0.101 | 100.4 |
| CHR1.10             | 0.117           | 107.4           |              |       |      |              |       |      |              |       |      | CHR5.9m      | 0.183 | 118.7 |
| CHR1.9              | 0.091           | 116.5           |              |       |      |              |       |      |              |       |      |              |       |       |

<sup>a</sup> DNA markers are described in Methods.

<sup>b</sup> Recombination frequency is between marker and above marker.

<sup>c</sup> Map position is in centiMorgans.
