# Supplementary material for: Routine mapping of Fusarium wilt resistance in BC1 populations of Arabidopsis thaliana
Source: PubMed Central journal article supplement (PMC3819736; doi:10.1186/1471-2229-13-171), 2013-10-30
Supplement: 1471-2229-13-171-S9.pdf [file 1471-2229-13-171-S9.pdf]

**Table S5. Sequence and location of PCR primers**

| Primer name | Nucleotide sequence               | Chromosome | Nucleotide <sup>a</sup> |
|-------------|-----------------------------------|------------|-------------------------|
| CHR1.1-F    | ttgttaaccaacatgcaattgcgaatc       | 1          | 522998                  |
| CHR1.1-R    | tctcgtgagttaatatgaaaacttgttattcc  | 1          | 523187                  |
| CHR1.2-F    | gcttagcttggtgtaacggatgagg         | 1          | 3774539                 |
| CHR1.2-R    | tgtgtgtagtctggtggtgaaagctg        | 1          | 3775015                 |
| CHR1.3-F    | ttaatcaggctggcctaatagccttt        | 1          | 7969890                 |
| CHR1.3-R    | gtggatttgcagtgctagttccctca        | 1          | 7970182                 |
| CHR1.4-F    | gatggcactcttcgggacggaaagat        | 1          | 11486951                |
| CHR1.4-R    | tttgcttgcaatgataccgctaggc         | 1          | 11487548                |
| CHR1.5-F    | gtgtctagccggcagaaaatcgtgtg        | 1          | 14544932                |
| CHR1.5-R    | tgcaggctcaattcgtgagcttagtc        | 1          | 14545134                |
| CHR1.6-F    | tgccaataactcctccaactccaatga       | 1          | 19265859                |
| CHR1.6-R    | tgcgatgactggtaaccgaactcttca       | 1          | 19266379                |
| CHR1.7n-F   | aaatccgaagagaaaaccggtgaaca        | 1          | 22502498                |
| CHR1.7n-R   | cctaattctcagcgaataacacaaaagaccaag | 1          | 22502752                |
| CHR1.8-F    | aggtggctcaacaattcagacatcttca      | 1          | 26280217                |
| CHR1.8-R    | tcatgcagattgacaaaatctcccttttc     | 1          | 26280547                |
| CHR1.9-F    | gaaaaggagatgccgtttcgtccctac       | 1          | 30425560                |
| CHR1.9-R    | caaagtcggttcgattgggttttgt         | 1          | 30426060                |
| CHR1.10-F   | aaacgctggaatgaaccactttgct         | 1          | 27919865                |
| CHR1.10-R   | catctgaagcaccataaccaccaccag       | 1          | 27920045                |
| CHR2.1-F    | ttcagtagatcgagcttgcaaatggaga      | 2          | 748923                  |
| CHR2.1-R    | cggacatgagtggtgattaagtggacc       | 2          | 749118                  |
| CHR2.2r-F   | agaagaggagaagacgaaatgtttggag      | 2          | 4191023                 |
| CHR2.2r-R   | cagaagcaaaagcagcgcagccagagt       | 2          | 4191264                 |
| CHR2.3o-F   | cgagttttcaaggtatcttttgccgacat     | 2          | 8928456                 |
| CHR2.3o-R   | gtggctaacgatgaacattgtccaagc       | 2          | 8928721                 |
| CHR2.4r-F   | aggtgaatgtcgagctaagtttggtgc       | 2          | 11590986                |
| CHR2.4r-R   | catcttgcaactacagcatccgttg         | 2          | 11591416                |
| CHR2.5-F    | gctcctgctgttcacgagccttctact       | 2          | 15602732                |
| CHR2.5-R    | taaccaacatgtttaaacttgccgaacc      | 2          | 15603022                |
| CHR2.6-F    | caaacgatggtcgcagaccctaattggag     | 2          | 18659800                |
| CHR2.6-R    | gggtggcaatcaaactcctctctctct       | 2          | 18660187                |
| CHR3.1-F    | tgtcgtctcttctcaatggctatgtca       | 3          | 129269                  |
| CHR3.1-R    | aagtttgttgcgatgaggctcggtct        | 3          | 129591                  |
| CHR3.2-F    | tggaagtattagtgccggatctacattgc     | 3          | 2867425                 |
| CHR3.2-R    | aacccaaaactgaaactgaaagtggtgcta    | 3          | 2867667                 |
| CHR3.3-F    | tgatggagtgaaaaagcatgtccattg       | 3          | 5440460                 |
| CHR3.3-R    | ctgaaagtataaccaaaagcgcgagcaa      | 3          | 5440672                 |
| CHR3.4-F    | ccccaccaattgaagacaaccatacaa       | 3          | 10116094                |
| CHR3.4-R    | tgcttatagacaggttggtactgaga        | 3          | 10116531                |
| CHR3.5-F    | ctcttgcaaccattaccattccgact        | 3          | 13614386                |
| CHR3.5-R    | ctaccaccggttagcttttgggatgt        | 3          | 13614935                |
| CHR3.6-F    | ccctgtctcaattgttctgagactg         | 3          | 17046915                |

|           |                                  |   |          |
|-----------|----------------------------------|---|----------|
| CHR3.6-R  | tgtcaatcctctgaaatcgtgaggaga      | 3 | 17047294 |
| CHR3.7-F  | ttctccggttaacttggcagatttcaga     | 3 | 19913874 |
| CHR3.7-R  | acgagtgcgaaaccgtcatctactga       | 3 | 19914149 |
| CHR3.8-F  | gtattggcgactccaaatcccattcac      | 3 | 22558313 |
| CHR3.8-R  | ctcctgtgatagectcacecgcctct       | 3 | 22558677 |
| CHR4.1-F  | gcagcgtagatcaacgtttcagcacat      | 4 | 426075   |
| CHR4.1-R  | aaaagcgttaaggcatcggttcttcat      | 4 | 426396   |
| CHR4.2-F  | cctcttagtgattactttcatgattcgcagca | 4 | 4104808  |
| CHR4.2-R  | tgcactttcaagtttagaataccatcgtgaca | 4 | 4105277  |
| CHR4.3-F  | ctccatccacctacgggcaaagtctac      | 4 | 6591300  |
| CHR4.3-R  | atcataggatgggaagtttcgggagca      | 4 | 6591817  |
| CHR4.4-F  | tcggagtcaccatttgatccaagttt       | 4 | 9530122  |
| CHR4.4-R  | tttgagcaaactctcatgtgacgcaac      | 4 | 9530746  |
| CHR4.5-F  | ttggttttgcagtccagatttgtag        | 4 | 12623968 |
| CHR4.5-R  | agtttgcgaagaagaacgaacaag         | 4 | 12624534 |
| CHR4.6-F  | tgatgtgaatcctgcaatctccttttcg     | 4 | 15363337 |
| CHR4.6-R  | aaaagtttgggccaacataacgatgctc     | 4 | 15363688 |
| CHR4.7-F  | cacatatgtgctcgtctacaattacatg     | 4 | 17772273 |
| CHR4.7-R  | tgacgtttcatcataatctttcccgc       | 4 | 17772492 |
| CHR5.1-F  | gactgtttctctcatcccgaagtcgctc     | 5 | 136060   |
| CHR5.1-R  | ctcggagacgatgcaacggtaaatatc      | 5 | 136630   |
| CHR5.2m-F | ctcccaagccacgacaagaccgtagta      | 5 | 2106256  |
| CHR5.2m-R | ggtggagagaatgatagcgtggaggaa      | 5 | 2106475  |
| CHR5.3-F  | gagataaaaggaacccggaagctgtg       | 5 | 6075313  |
| CHR5.3-R  | tcaaggagtcccaaatgttcctgtca       | 5 | 6075771  |
| CHR5.4-F  | aaagcttgatgggaagttcgtgctttg      | 5 | 9615178  |
| CHR5.4-R  | tgaggctgggaactattgcctcttacg      | 5 | 9615409  |
| CHR5.5-F  | tgcacccggtgaaaaacaatcaacact      | 5 | 14106388 |
| CHR5.5-R  | aaaagctggctggtggtcctcctctac      | 5 | 14106691 |
| CHR5.6-F  | ggcaaggaggtttcttcccccttaat       | 5 | 17462820 |
| CHR5.6-R  | gcagcttagcaactgcatctgccttac      | 5 | 17463086 |
| CHR5.7-F  | gagtcaccttctcagttggcctggaa       | 5 | 20821073 |
| CHR5.7-R  | atgaggagctttgcaggtcggatatga      | 5 | 20821421 |
| CHR5.8-F  | atggcacaatcaaccaaggaaggtg        | 5 | 24272565 |
| CHR5.8-R  | gtccagttgtgcaaccggcttcagt        | 5 | 24272963 |
| CHR5.9m-F | tattcagaagtatagagggttaggggg      | 5 | 26589095 |
| CHR5.9m-R | ggtcaggctggcatgtgtgattgggtc      | 5 | 26589512 |

<sup>a</sup> Position of most 5' nucleotide in the Col-0 reference genome sequence.
