# Supplementary material for: Routine mapping of Fusarium wilt resistance in BC1 populations of Arabidopsis thaliana
Source: PubMed Central journal article supplement (PMC3819736; doi:10.1186/1471-2229-13-171), 2013-10-30
Supplement: 1471-2229-13-171-S10.pdf [file 1471-2229-13-171-S10.pdf]

**Table S6. Expected PCR products of three sets of multiplex markers**

| Set 1 <sup>a</sup> |           | Set 2   |           | Set 3   |           |
|--------------------|-----------|---------|-----------|---------|-----------|
| Marker             | Basepairs | Marker  | Basepairs | Marker  | Basepairs |
| CHR1.4             | 598       | CHR5.1  | 571       | CHR4.4  | 625       |
| CHR3.5             | 550       | CHR1.6  | 521       | CHR4.5  | 567       |
| CHR1.9             | 501       | CHR1.2  | 477       | CHR4.3  | 518       |
| CHR5.3             | 459       | CHR3.4  | 438       | CHR4.2  | 470       |
| CHR5.9m            | 418       | CHR5.8  | 399       | CHR2.4s | 429       |
| CHR3.6             | 380       | CHR3.8  | 365       | CHR2.6  | 388       |
| CHR5.7             | 349       | CHR1.8  | 331       | CHR4.6  | 352       |
| CHR3.1             | 323       | CHR5.5  | 304       | CHR4.1  | 322       |
| CHR1.3             | 293       | CHR3.7  | 276       | CHR2.5  | 291       |
| CHR5.6             | 267       | CHR1.7n | 255       | CHR2.3o | 266       |
| CHR3.2             | 243       | CHR5.4  | 232       | CHR2.2r | 240       |
| CHR5.2m            | 220       | CHR3.3  | 213       | CHR4.7  | 220       |
| CHR1.5             | 203       | CHR1.1  | 190       | CHR2.1  | 196       |
| CHR1.10            | 181       |         |           |         |           |

<sup>a</sup> Set of 13 or 14 DNA markers are simultaneously amplified by multiplex PCR.
